# Supplementary material for: Fullerenol C60(OH)16prevents amyloid fibrillization of Aβ40– in vitro and in silico approach
Source: Royal Society of Chemistry journal article supplement (doi:10.1039/c6cp00901h), 2016-01-01
Supplement: c6cp00901h1.pdf [file c6cp00901h1.pdf]

## Supplement information

### Fullerenol C<sub>60</sub>(OH)<sub>16</sub> prevents amyloid fibrillization of A $\beta$ <sub>40</sub>:

#### *in vitro* and *in silico* approach

‡<sup>a,b</sup>Zuzana Bednarikova, ‡<sup>c</sup>Pham Dinh Quoc Huy, <sup>d</sup>Maria-Magdalena Mocanu, <sup>a</sup>Diana Fedunova, <sup>c</sup>Mai Suan Li\*, <sup>a,e</sup>Gazova Zuzana\*

<sup>a</sup>Department of Biophysics, Institute of Experimental Physics, Slovak Academy of Sciences, Watsonova 47, 040 01 Kosice, Slovakia

<sup>b</sup>Department of Biochemistry, Institute of Chemistry, Faculty of Science, Safarik University, Srobarova 2, 041 54 Kosice, Slovakia

<sup>c</sup>Institute of Physics, Polish Academy of Sciences, Al. Lotnikow 32/46, 02-668 Warsaw, Poland

<sup>d</sup>Department of Biophysics, "Carol Davila" University of Medicine and Pharmacy, 050474 Bucharest, Romania

<sup>e</sup>Department of Medical and Clinical Biochemistry, Institute of Chemistry, Faculty of Medicine, Safarik University, Trieda SNP 1, 040 11 Kosice, Slovakia

‡ These authors contributed equally

Table S1: Energy obtained by gaussian 09 (Hartree Fock method) for 7 isomers. The difference from the lowest energy of isomer L1 is also shown.

| Isomers | Energy (kcal/mol) | Energy (Hartree) | Energy difference E-E(L1) (kcal/mol) |
|---------|-------------------|------------------|--------------------------------------|
| L1      | -2183012.64       | -3478.89         | 0                                    |
| L2      | -2182988.16       | -3478.85         | 24.48                                |
| L3      | -2182928.96       | -3478.75         | 83.68                                |
| L4      | -2182928.53       | -3478.75         | 84.11                                |
| L5      | -2182917.39       | -3478.74         | 95.25                                |
| L6      | -2182911.82       | -3478.73         | 100.82                               |
| L7      | -2182896.60       | -3478.70         | 116.04                               |

Table S2: Parameters of isomer L1 which have been used for MD simulations. Here,  $\epsilon$  is the depth of the Lennard-Jones potential well and  $R$  is the van der Waals radius.

| Atom name | Atom type | Charge    | R(Angstrom) | e(kcal/mol) |
|-----------|-----------|-----------|-------------|-------------|
| C1        | ca        | -0.098838 | 1.9080      | 0.0860      |
| C2        | ca        | -0.038046 | 1.9080      | 0.0860      |
| C3        | ca        | 0.115008  | 1.9080      | 0.0860      |
| C4        | ca        | 0.241845  | 1.9080      | 0.0860      |
| C5        | ca        | -0.125665 | 1.9080      | 0.0860      |
| C6        | ca        | -0.148336 | 1.9080      | 0.0860      |
| C7        | ca        | 0.150585  | 1.9080      | 0.0860      |
| C8        | ca        | 0.105281  | 1.9080      | 0.0860      |
| C9        | ca        | -0.316049 | 1.9080      | 0.0860      |
| C10       | ca        | -0.007806 | 1.9080      | 0.0860      |
| C11       | c3        | 0.397228  | 1.9080      | 0.1094      |
| C12       | ca        | -0.201241 | 1.9080      | 0.0860      |
| C13       | ca        | -0.039249 | 1.9080      | 0.0860      |
| C14       | ca        | 0.234673  | 1.9080      | 0.0860      |
| C15       | ca        | 0.231847  | 1.9080      | 0.0860      |
| C16       | ca        | 0.275651  | 1.9080      | 0.0860      |
| C17       | ca        | -0.143573 | 1.9080      | 0.0860      |
| C18       | ca        | -0.266987 | 1.9080      | 0.0860      |
| C19       | ca        | 0.017040  | 1.9080      | 0.0860      |
| C20       | ca        | -0.154213 | 1.9080      | 0.0860      |
| C21       | c3        | 0.443897  | 1.9080      | 0.1094      |
| C22       | ca        | 0.027613  | 1.9080      | 0.0860      |
| C23       | ca        | -0.099320 | 1.9080      | 0.0860      |
| O1        | oh        | -0.737394 | 1.7210      | 0.2104      |
| C24       | c3        | 0.382274  | 1.9080      | 0.1094      |
| O2        | oh        | -0.609322 | 1.7210      | 0.2104      |
| C25       | c3        | 0.069706  | 1.9080      | 0.1094      |
| O3        | oh        | -0.599121 | 1.7210      | 0.2104      |
| C26       | ca        | -0.189523 | 1.9080      | 0.0860      |
| C27       | c3        | 0.145490  | 1.9080      | 0.1094      |
| C28       | ca        | -0.286384 | 1.9080      | 0.0860      |
| C29       | ca        | -0.082145 | 1.9080      | 0.0860      |
| C30       | ca        | -0.232211 | 1.9080      | 0.0860      |
| C31       | c3        | -0.028825 | 1.9080      | 0.1094      |
| C32       | c3        | 0.457301  | 1.9080      | 0.1094      |
| C33       | c3        | 0.219942  | 1.9080      | 0.1094      |
| O4        | oh        | -0.593563 | 1.7210      | 0.2104      |
| C34       | c3        | 0.603461  | 1.9080      | 0.1094      |
| O5        | oh        | -0.527354 | 1.7210      | 0.2104      |
| C35       | ca        | -0.345842 | 1.9080      | 0.0860      |
| O6        | oh        | -0.647077 | 1.7210      | 0.2104      |
| C36       | ca        | -0.212117 | 1.9080      | 0.0860      |
| O7        | oh        | -0.546570 | 1.7210      | 0.2104      |
| C37       | ca        | 0.299873  | 1.9080      | 0.0860      |
| C38       | ca        | -0.064014 | 1.9080      | 0.0860      |
| C39       | ca        | -0.124707 | 1.9080      | 0.0860      |
| C40       | ca        | 0.048255  | 1.9080      | 0.0860      |
| C41       | ca        | 0.015016  | 1.9080      | 0.0860      |
| C42       | ca        | -0.030701 | 1.9080      | 0.0860      |
| C43       | ca        | -0.104143 | 1.9080      | 0.0860      |
| C44       | ca        | -0.152960 | 1.9080      | 0.0860      |
| C45       | ca        | 0.225667  | 1.9080      | 0.0860      |
| C46       | c3        | 0.433485  | 1.9080      | 0.1094      |
| O8        | oh        | -0.552526 | 1.7210      | 0.2104      |

|     |    |           |        |        |
|-----|----|-----------|--------|--------|
| C47 | ca | -0.235044 | 1.9080 | 0.0860 |
| O9  | oh | -0.598552 | 1.7210 | 0.2104 |
| C48 | c3 | 0.345881  | 1.9080 | 0.1094 |
| O10 | oh | -0.474333 | 1.7210 | 0.2104 |
| C49 | c3 | 0.755559  | 1.9080 | 0.1094 |
| O11 | oh | -0.591031 | 1.7210 | 0.2104 |
| C50 | c3 | 0.229346  | 1.9080 | 0.1094 |
| C51 | c3 | 0.574169  | 1.9080 | 0.1094 |
| C52 | c3 | 0.266961  | 1.9080 | 0.1094 |
| H1  | ho | 0.388878  | 0      | 0      |
| H2  | ho | 0.351547  | 0      | 0      |
| H3  | ho | 0.407926  | 0      | 0      |
| H4  | ho | 0.354853  | 0      | 0      |
| H5  | ho | 0.392802  | 0      | 0      |
| H6  | ho | 0.352540  | 0      | 0      |
| H7  | ho | 0.420668  | 0      | 0      |
| H8  | ho | 0.367224  | 0      | 0      |
| H9  | ho | 0.398003  | 0      | 0      |
| H10 | ho | 0.418967  | 0      | 0      |
| H11 | ho | 0.483522  | 0      | 0      |
| C53 | ca | 0.026112  | 1.9080 | 0.0860 |
| C54 | ca | -0.139177 | 1.9080 | 0.0860 |
| C55 | ca | -0.141328 | 1.9080 | 0.0860 |
| C56 | ca | 0.353539  | 1.9080 | 0.0860 |
| C57 | c3 | -0.099611 | 1.9080 | 0.1094 |
| C58 | ca | -0.315448 | 1.9080 | 0.0860 |
| C59 | ca | -0.129596 | 1.9080 | 0.0860 |
| C60 | ca | 0.003351  | 1.9080 | 0.0860 |
| O12 | oh | -0.687294 | 1.7210 | 0.2104 |
| O13 | oh | -0.559361 | 1.7210 | 0.2104 |
| O14 | oh | -0.527926 | 1.7210 | 0.2104 |
| O15 | oh | -0.529634 | 1.7210 | 0.2104 |
| O16 | oh | -0.655368 | 1.7210 | 0.2104 |
| H12 | ho | 0.368695  | 0      | 0      |
| H13 | ho | 0.379670  | 0      | 0      |
| H14 | ho | 0.442100  | 0      | 0      |
| H15 | ho | 0.391904  | 0      | 0      |
| H16 | ho | 0.374174  | 0      | 0      |

Table S3: Parameters of isomer L7 which have been used for MD simulations. Here,  $\epsilon$  is the depth of the Lennard-Jones potential well and  $R$  is the van der Waals radius.

| Atom name | Atom type | Charge    | $R$ (Å) | $\epsilon$ (kcal/mol) |
|-----------|-----------|-----------|---------|-----------------------|
| C1        | c3        | 0.269200  | 1.9080  | 0.1094                |
| C2        | ce        | -0.081200 | 1.9080  | 0.0860                |
| C3        | c2        | -0.124400 | 1.9080  | 0.0860                |
| C4        | c3        | 0.236300  | 1.9080  | 0.1094                |
| C5        | c3        | 0.237200  | 1.9080  | 0.1094                |
| C6        | ce        | 0.030800  | 1.9080  | 0.0860                |
| C7        | ca        | -0.013800 | 1.9080  | 0.0860                |
| C8        | ce        | -0.103200 | 1.9080  | 0.0860                |
| C9        | ca        | -0.079300 | 1.9080  | 0.0860                |
| C10       | ca        | -0.086300 | 1.9080  | 0.0860                |
| C11       | ca        | -0.116300 | 1.9080  | 0.0860                |
| C12       | c2        | -0.188400 | 1.9080  | 0.0860                |
| C13       | ce        | -0.054200 | 1.9080  | 0.0860                |
| C14       | cf        | -0.026200 | 1.9080  | 0.0860                |
| C15       | cf        | -0.085200 | 1.9080  | 0.0860                |
| C16       | c3        | 0.265200  | 1.9080  | 0.1094                |
| C17       | c2        | -0.168400 | 1.9080  | 0.0860                |
| C18       | cf        | -0.012200 | 1.9080  | 0.0860                |
| C19       | c3        | 0.235300  | 1.9080  | 0.1094                |
| C20       | ca        | 0.012200  | 1.9080  | 0.0860                |
| C21       | ca        | -0.001800 | 1.9080  | 0.0860                |
| C22       | ce        | -0.018400 | 1.9080  | 0.0860                |
| C23       | ce        | -0.073400 | 1.9080  | 0.0860                |
| C24       | c3        | 0.235300  | 1.9080  | 0.1094                |
| C25       | c3        | 0.277400  | 1.9080  | 0.1094                |
| C26       | cf        | 0.058800  | 1.9080  | 0.0860                |
| C27       | ca        | -0.010800 | 1.9080  | 0.0860                |
| C28       | c3        | 0.277300  | 1.9080  | 0.1094                |
| C29       | c3        | 0.227200  | 1.9080  | 0.1094                |
| C30       | cf        | 0.012000  | 1.9080  | 0.0860                |
| C31       | cf        | -0.083200 | 1.9080  | 0.0860                |
| C32       | ca        | -0.082300 | 1.9080  | 0.0860                |
| C33       | ca        | -0.010000 | 1.9080  | 0.0860                |
| C34       | ca        | -0.025300 | 1.9080  | 0.0860                |
| C35       | ca        | 0.001000  | 1.9080  | 0.0860                |
| C36       | cf        | -0.069300 | 1.9080  | 0.0860                |
| C37       | ca        | 0.010000  | 1.9080  | 0.0860                |
| C38       | c3        | 0.228200  | 1.9080  | 0.1094                |
| C39       | c3        | 0.271200  | 1.9080  | 0.1094                |
| C40       | c3        | 0.236400  | 1.9080  | 0.1094                |

|     |    |           |        |        |
|-----|----|-----------|--------|--------|
| C41 | cf | -0.006400 | 1.9080 | 0.0860 |
| C42 | ca | -0.000800 | 1.9080 | 0.0860 |
| C43 | ca | -0.043300 | 1.9080 | 0.0860 |
| C44 | ca | -0.009000 | 1.9080 | 0.0860 |
| C45 | ca | -0.099300 | 1.9080 | 0.0860 |
| C46 | ce | -0.072300 | 1.9080 | 0.0860 |
| C47 | c3 | 0.280400  | 1.9080 | 0.1094 |
| C48 | cf | -0.003000 | 1.9080 | 0.0860 |
| C49 | c2 | -0.110400 | 1.9080 | 0.0860 |
| C50 | c3 | 0.241200  | 1.9080 | 0.1094 |
| C51 | ce | -0.047400 | 1.9080 | 0.0860 |
| C52 | cf | -0.095200 | 1.9080 | 0.0860 |
| C53 | ca | -0.094300 | 1.9080 | 0.0860 |
| C54 | ca | -0.018800 | 1.9080 | 0.0860 |
| C55 | ca | -0.083300 | 1.9080 | 0.0860 |
| C56 | ca | -0.084300 | 1.9080 | 0.0860 |
| C57 | c3 | 0.271300  | 1.9080 | 0.1094 |
| C58 | c3 | 0.283300  | 1.9080 | 0.1094 |
| C59 | ca | 0.020000  | 1.9080 | 0.0860 |
| C60 | ca | 0.025000  | 1.9080 | 0.0860 |
| O1  | oh | -0.563800 | 1.7210 | 0.2104 |
| H11 | ho | 0.439000  | 0      | 0      |
| O2  | oh | -0.566800 | 1.7210 | 0.2104 |
| H10 | ho | 0.423000  | 0      | 0      |
| O3  | oh | -0.577800 | 1.7210 | 0.2104 |
| H6  | ho | 0.450000  | 0      | 0      |
| O7  | oh | -0.540800 | 1.7210 | 0.2104 |
| H4  | ho | 0.435000  | 0      | 0      |
| O5  | oh | -0.570800 | 1.7210 | 0.2104 |
| H1  | ho | 0.420000  | 0      | 0      |
| O4  | oh | -0.563800 | 1.7210 | 0.2104 |
| H7  | ho | 0.442000  | 0      | 0      |
| O6  | oh | -0.565800 | 1.7210 | 0.2104 |
| H5  | ho | 0.433000  | 0      | 0      |
| O8  | oh | -0.538800 | 1.7210 | 0.2104 |
| H2  | ho | 0.431000  | 0      | 0      |
| O9  | oh | -0.563800 | 1.7210 | 0.2104 |
| H8  | ho | 0.433000  | 0      | 0      |
| O11 | oh | -0.537800 | 1.7210 | 0.2104 |
| H9  | ho | 0.435000  | 0      | 0      |
| O13 | oh | -0.575800 | 1.7210 | 0.2104 |
| H16 | ho | 0.444000  | 0      | 0      |
| O10 | oh | -0.557800 | 1.7210 | 0.2104 |
| H3  | ho | 0.432000  | 0      | 0      |

|     |    |           |        |        |
|-----|----|-----------|--------|--------|
| O14 | oh | -0.561800 | 1.7210 | 0.2104 |
| H15 | ho | 0.441000  | 0      | 0      |
| O16 | oh | -0.520800 | 1.7210 | 0.2104 |
| H13 | ho | 0.415000  | 0      | 0      |
| O15 | oh | -0.529800 | 1.7210 | 0.2104 |
| H14 | ho | 0.430000  | 0      | 0      |
| O12 | oh | -0.558800 | 1.7210 | 0.2104 |
| H12 | ho | 0.434000  | 0      | 0      |

Table S4. Binding energy  $\Delta E_{\text{bind}}$  (kcal/mol) obtained by the docking method for 7 isomers in five  $A\beta_{40}$  models. Error bars come from averaging over five models.

|         | L1             | L2             | L3             | L4             | L5             | L6             | L7            |
|---------|----------------|----------------|----------------|----------------|----------------|----------------|---------------|
| M1      | -5.9           | -5.5           | -6.5           | -6.3           | -6.6           | -5.9           | -5.9          |
| M2      | -6.7           | -6.6           | -6.1           | -6.1           | -6.7           | -6.4           | -6.3          |
| M3      | -7.4           | -7.5           | -6.4           | -6.6           | -6.9           | -7.3           | -6.2          |
| M4      | -7.8           | -7.3           | -6.5           | -6.4           | -6.7           | -7.2           | -7.0          |
| M5      | -6.6           | -5.8           | -6.1           | -5.7           | -6.0           | -6.3           | -5.3          |
| Average | $-6.9 \pm 0.7$ | $-6.5 \pm 0.9$ | $-6.3 \pm 0.2$ | $-6.2 \pm 0.3$ | $-6.6 \pm 0.3$ | $-6.6 \pm 0.6$ | $6.1 \pm 0.6$ |

Table S5. Binding energy  $\Delta E_{\text{bind}}$  (kcal/mol) obtained by the docking method for the most unstable isomer L7.  $N_{\text{hb}}$  and  $N_{\text{sc}}$  refer to the number of hydrogen bonds and side-chain contacts, respectively. See Figure S3 and Figure S4 for more information about HBs and SC contact networks.

| Model | $\Delta E_{\text{bind}}$ | $N_{\text{hb}}$ | $N_{\text{sc}}$ | Amino acids in side-chain contact with ligand                                      |
|-------|--------------------------|-----------------|-----------------|------------------------------------------------------------------------------------|
| 1     | -5.90                    | 3               | 11              | Asp1 , Glu3 , Arg5 , Val18 , Ala21 , Asp23 , Ser26 , Lys28 , Ile32 , Gly33 , Leu34 |
| 2     | -6.30                    | 4               | 10              | His6 , Asp7 , Ser8 , Gly9 , His13 , His14 , Lys16 , Asp23 , Val24 , Gly25          |
| 3     | -6.20                    | 0               | 6               | Val12 , Gln15 , Lys16 , Leu17 , Phe19 , Glu22                                      |
| 4     | -7.00                    | 3               | 9               | Phe4 , Ser8 , Tyr10 , His13 , Val36 , Gly37 , Gly38 , Val39 , Val40                |
| 5     | -5.30                    | 4               | 9               | Ala2 , Gly9 , Tyr10 , Ile31 , Val36 , Gly37 , Gly38 , Val39 , Val40                |

Table S6. Binding free energy (kcal/mol) of isomer L7 to A $\beta$ <sub>40</sub> obtained by the MM-PBSA method. The van der Waals ( $\Delta E_{vdw}$ ) and electrostatic interactions for OH groups and carbon atoms ( $\Delta E_{elec}$ ) are in red and blue, respectively.

| Model   | Traj | $\Delta E_{vdw}$ | $\Delta E_{elec}$ | $\Delta E_{PB}$ | $\Delta E_{sur}$ | -TAS | $\Delta G_{bind}$ | $\Delta G_{bind}$ |
|---------|------|------------------|-------------------|-----------------|------------------|------|-------------------|-------------------|
| 1       | 1    | -49.5            | -85.5             | 100.9           | -2.9             | 19.4 | -17.3             | -21.3             |
|         |      | -6.8             | -42.7             |                 |                  |      |                   |                   |
|         | 2    | -55.5            | -103.6            | 121.1           | -3.6             | 16.0 | -25.4             |                   |
|         |      | -6.6             | -48.9             |                 |                  |      |                   |                   |
| 2       | 1    | -51.6            | -92.6             | 111.8           | -2.9             | 20.4 | -14.7             | -23.7             |
|         |      | -6.3             | -45.3             |                 |                  |      |                   |                   |
|         | 2    | -71.6            | -107.6            | 134.4           | -4.1             | 15.9 | -32.8             |                   |
|         |      | -8.5             | -63.1             |                 |                  |      |                   |                   |
| 3       | 1    | -62.0            | -128.8            | 144.8           | -4.1             | 18.3 | -31.6             | -33.0             |
|         |      | -6.6             | -55.4             |                 |                  |      |                   |                   |
|         | 2    | -75.8            | -110.9            | 142.2           | -4.6             | 14.3 | -34.5             |                   |
|         |      | -12.1            | -63.6             |                 |                  |      |                   |                   |
| 4       | 1    | -46.0            | -115.7            | 136.3           | -3.3             | 19.6 | -8.9              | -7.7              |
|         |      | -1.2             | -44.8             |                 |                  |      |                   |                   |
|         | 2    | -33.6            | -98.9             | 110.2           | -2.3             | 17.8 | -6.6              |                   |
|         |      | 0.4              | -34.0             |                 |                  |      |                   |                   |
| 5       | 1    | -49.6            | -81.0             | 103.4           | -3.1             | 19.4 | -10.6             | -10.3             |
|         |      | -8.8             | -40.8             |                 |                  |      |                   |                   |
|         | 2    | -40.3            | -60.8             | 78.9            | -2.7             | 17.3 | -9.9              |                   |
|         |      | -8.0             | -34.9             |                 |                  |      |                   |                   |
| Average |      | -53.8            | -98.5             | 118.4           | -3.4             | 17.8 | <b>-19.2</b>      |                   |

Table S7. List of residues locating near isomer L7 of C<sub>60</sub>(OH)<sub>16</sub>. Results were obtained by the MD simulations. The adjacent amino acids are defined as those forming contact with fulleranol more than 50% of time in equilibrium (Figure 6).

| Model | Residues                                                                                                                           |
|-------|------------------------------------------------------------------------------------------------------------------------------------|
| 1     | Glu3, Arg5, His14, Ala21, Glu22, Asp23, Val24, Gly25, Ser26, Asn27, Lys28, Gly29, Ile32, Gly33, Leu34                              |
| 2     | Phe4, His6, Asp7, Ser8, Gly9, Tyr10, His14, Val24, Gly25, Ser26, Asn27, Lys28, Ala30, Gly33, Gly37, Gly38                          |
| 3     | Ala2, Glu11, Val12, His13, His14, Gln15, Lys16, Glu22, Asp23, Val24, Gly25, Ser26, Asn27, Lys28, Ile31, Met35, Gly37, Gly38, Val39 |
| 4     | Ala2, Glu3, Phe4, Arg5, Asp7, Tyr10, Ser26, Asn27, Lys28, Leu34, Val36, Gly37, Gly38, Val39, Val40                                 |
| 5     | Ala2, Arg5, Gly9, Tyr10, Glu11, Val12, Phe19, Phe20, Met35, Val36, Gly37, Gly38, Val39, Val40                                      |

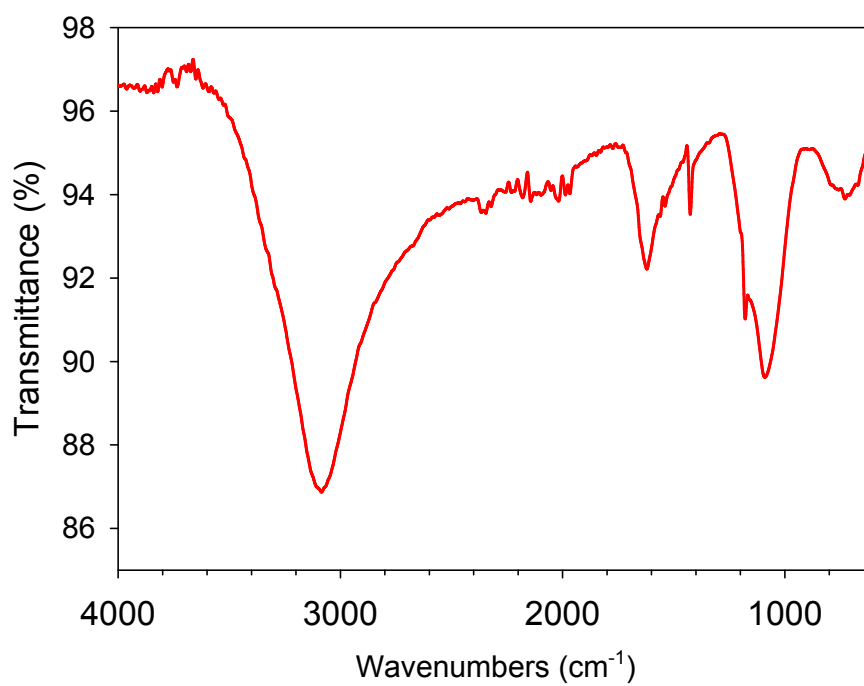

Figure S1. FTIR spectrum of fullerene C<sub>60</sub>(OH)<sub>16</sub> prepared according procedure published by Wang *et al.*<sup>30</sup> The spectrum corresponds to spectrum of the fullerene C<sub>60</sub> which carries 16 ± 2 OH groups as determined by Wang *et al.*<sup>30</sup> Concentration of C<sub>60</sub>(OH)<sub>16</sub> fullerene was 15 mg/ml.



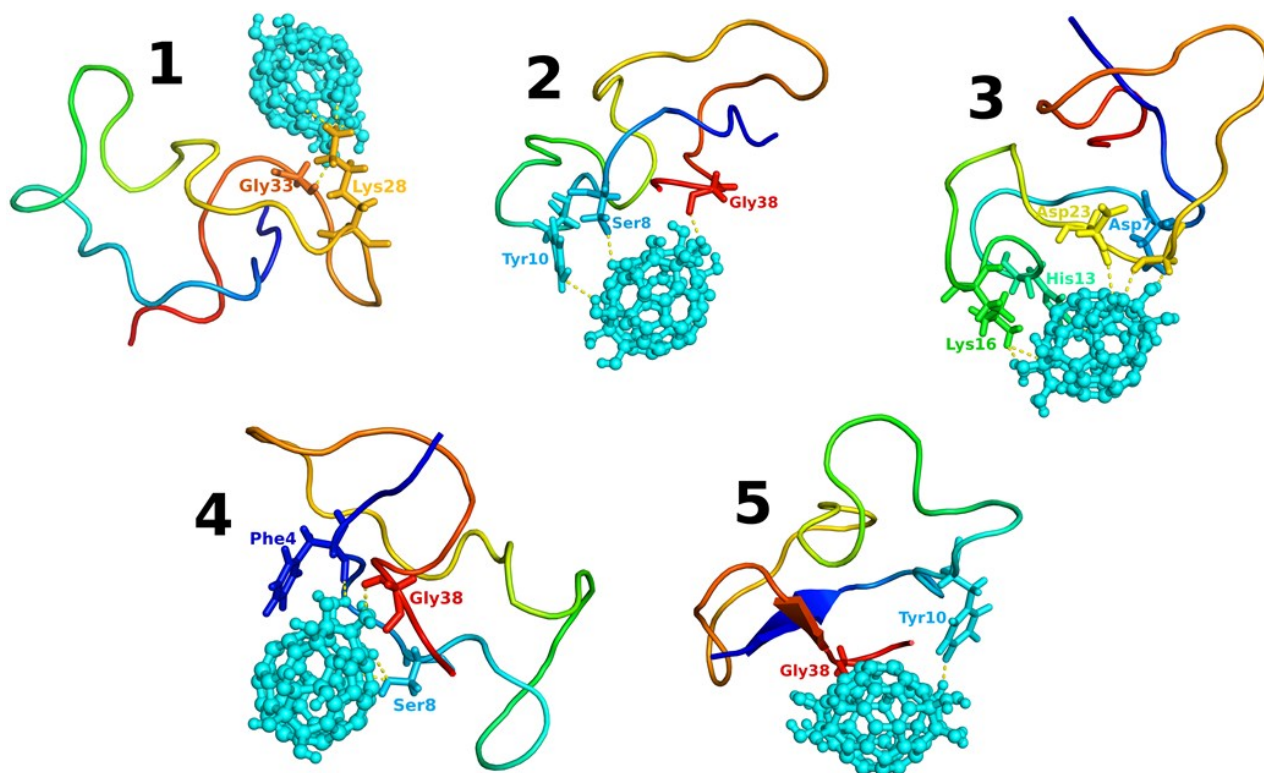

Figure S2: Docking poses of isomer L1 in the five models. Yellow dashed lines represent hydrogen bonds between L1 and Aβ40.

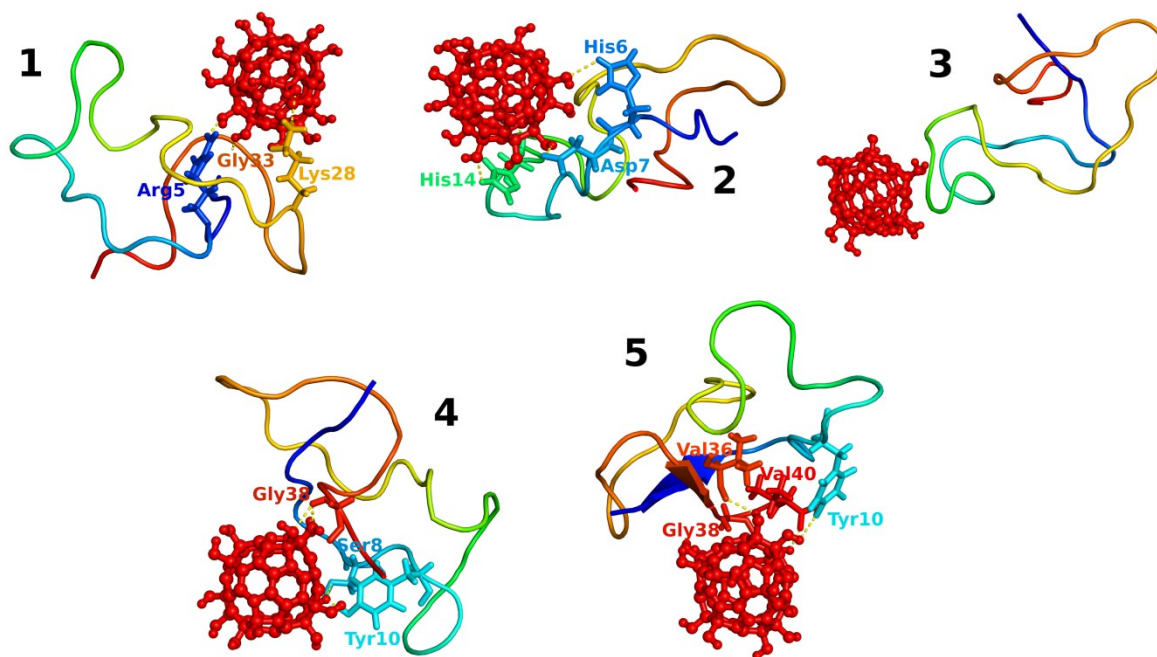

Figure S3. Hydrogen bond network formed by the most unstable isomer L7 with A $\beta$ 40 in five structure models. Yellow dashed line represents the hydrogen bond. The names of residues forming hydrogen bonds with fulleranol are explicitly shown. Results were obtained by the docking method.

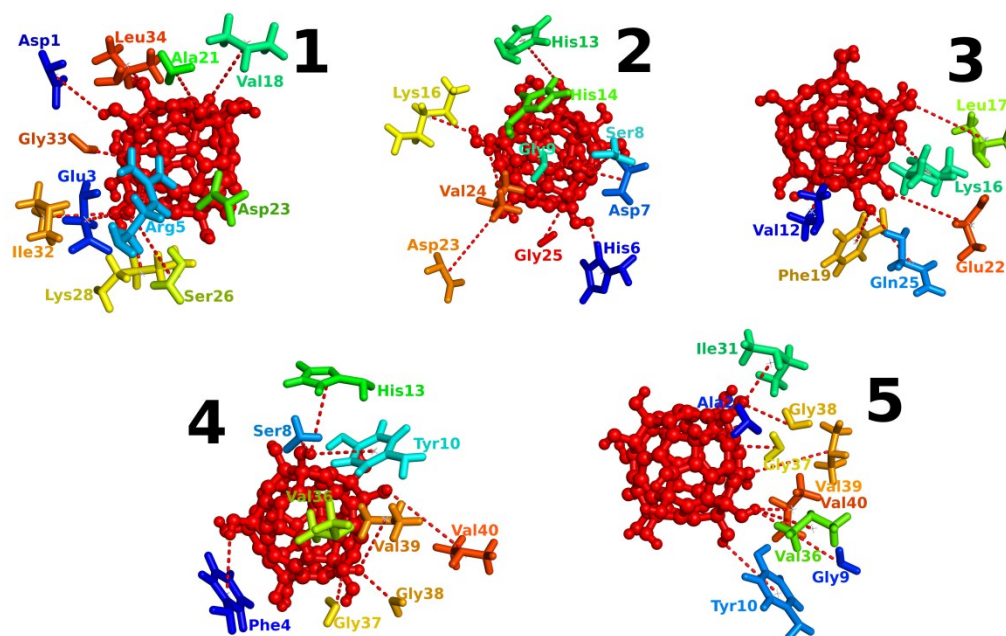

Figure S4. Side-chain contacts between A $\beta$ 40 and isomer L7 in the best docking poses of 5 structure models (red dashed lines). The names of residues forming SC with fulleranol are explicitly shown.

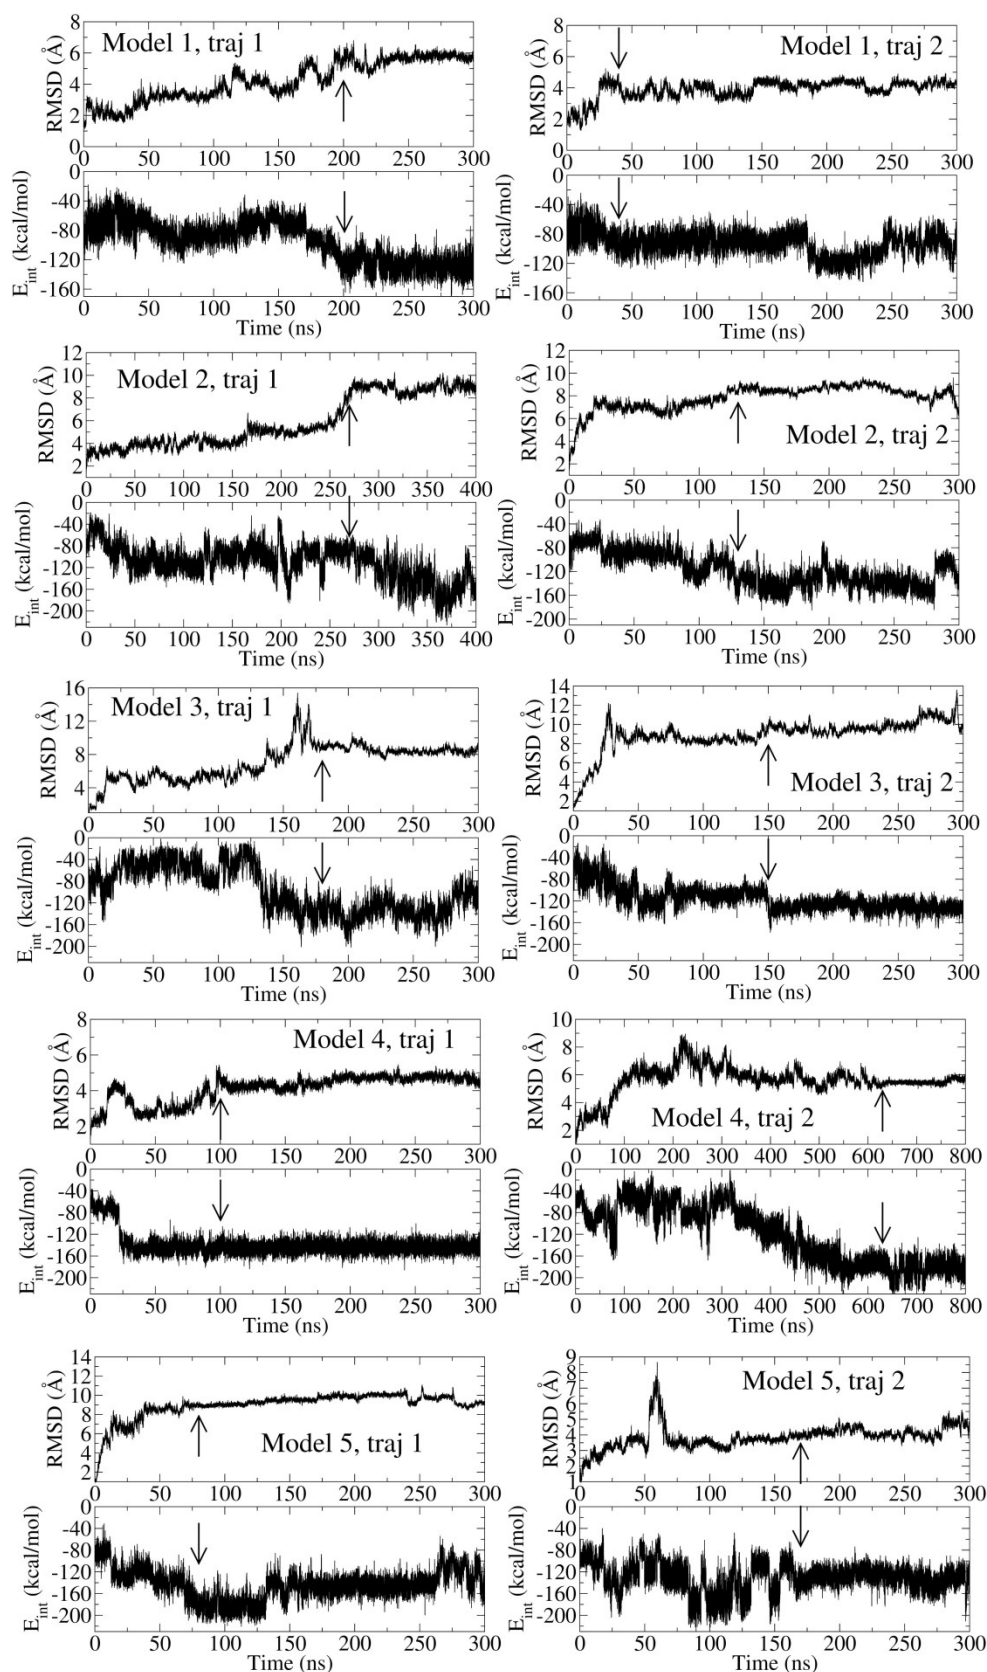

Figure S5. The time evolution of the RMSD and interaction energy for A $\beta$ 40-L1 complexes. The arrow refers to the time when the system reaches equilibrium. Snapshots collected after arrow was used for MM/PBSA calculation.

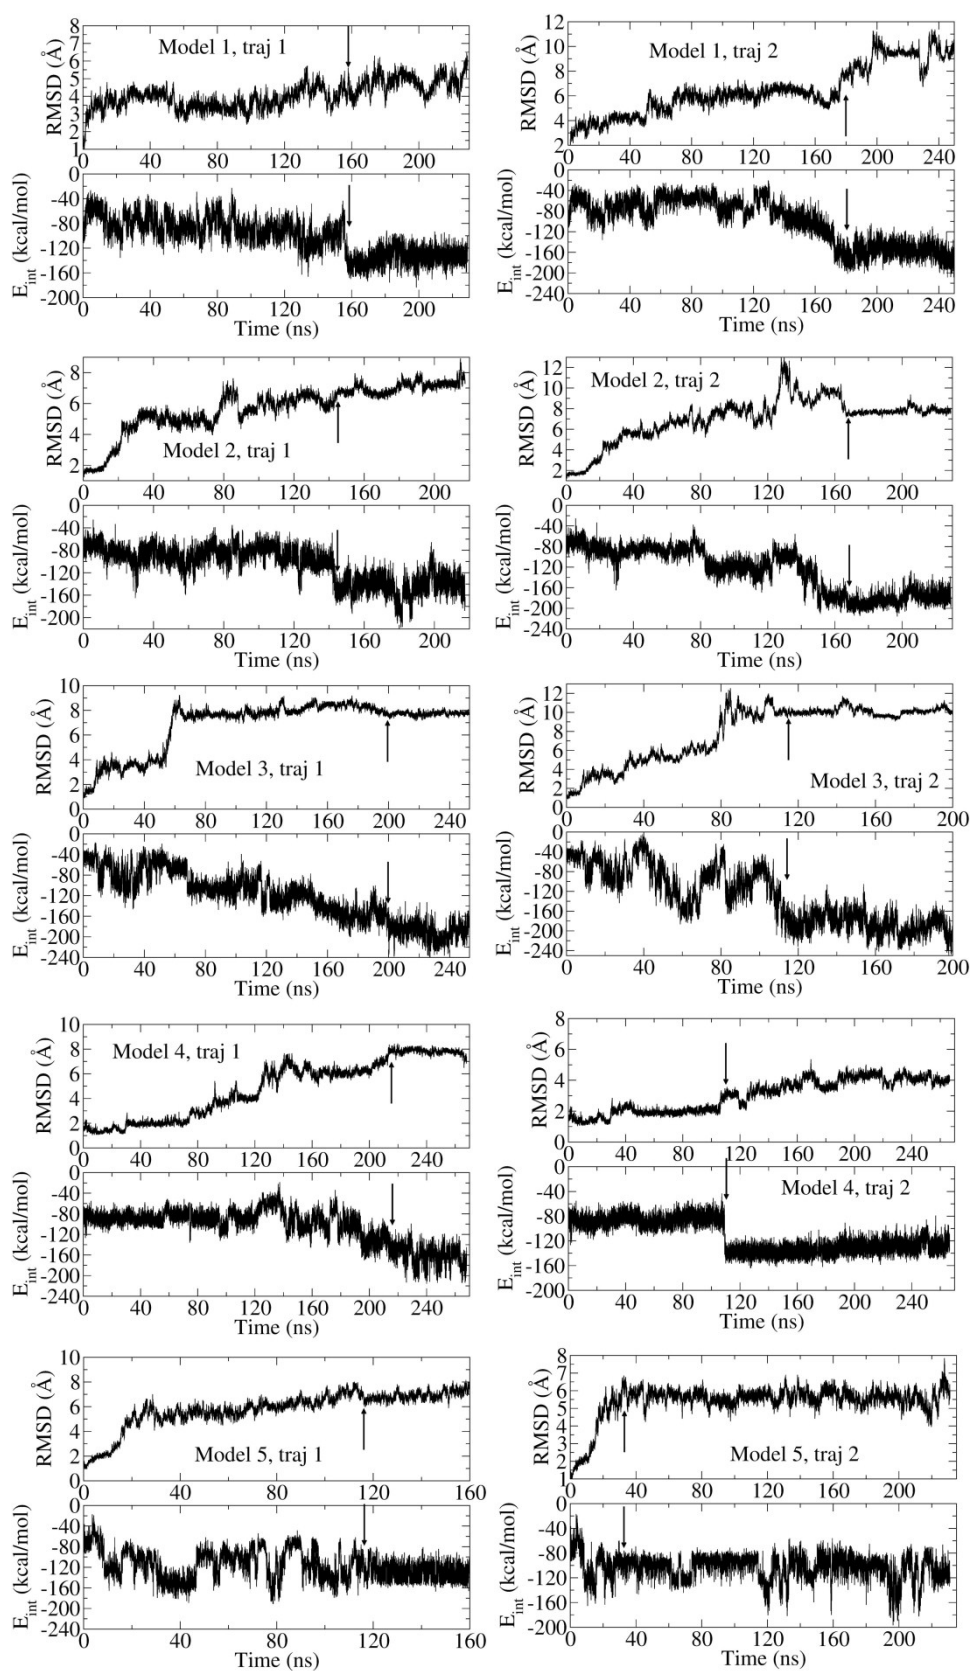

Figure S6. The time evolution of the RMSD and interaction energy for A $\beta$ 40-L7 complexes. The arrow refers to the time when the system reaches equilibrium. Snapshots collected after arrow was used for MM/PBSA calculation.

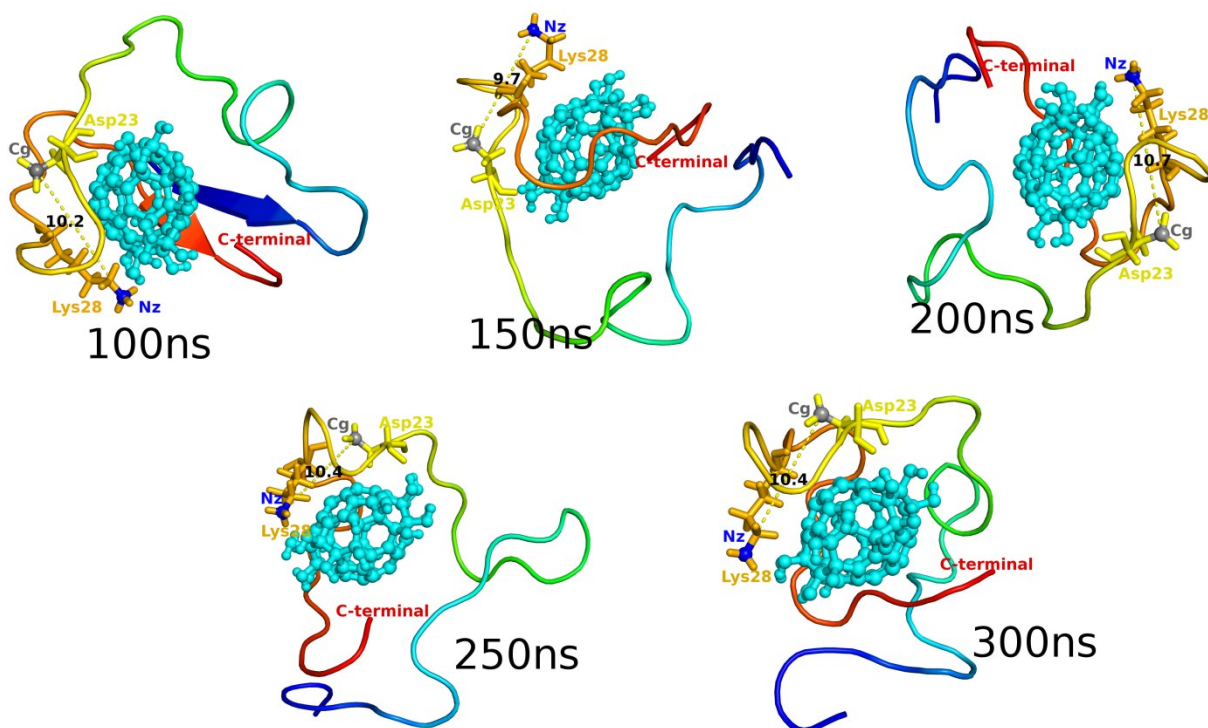

Figure S7. Representative snapshots where isomer L1 forms SC contacts with the salt bridge as well as with the C-terminus.

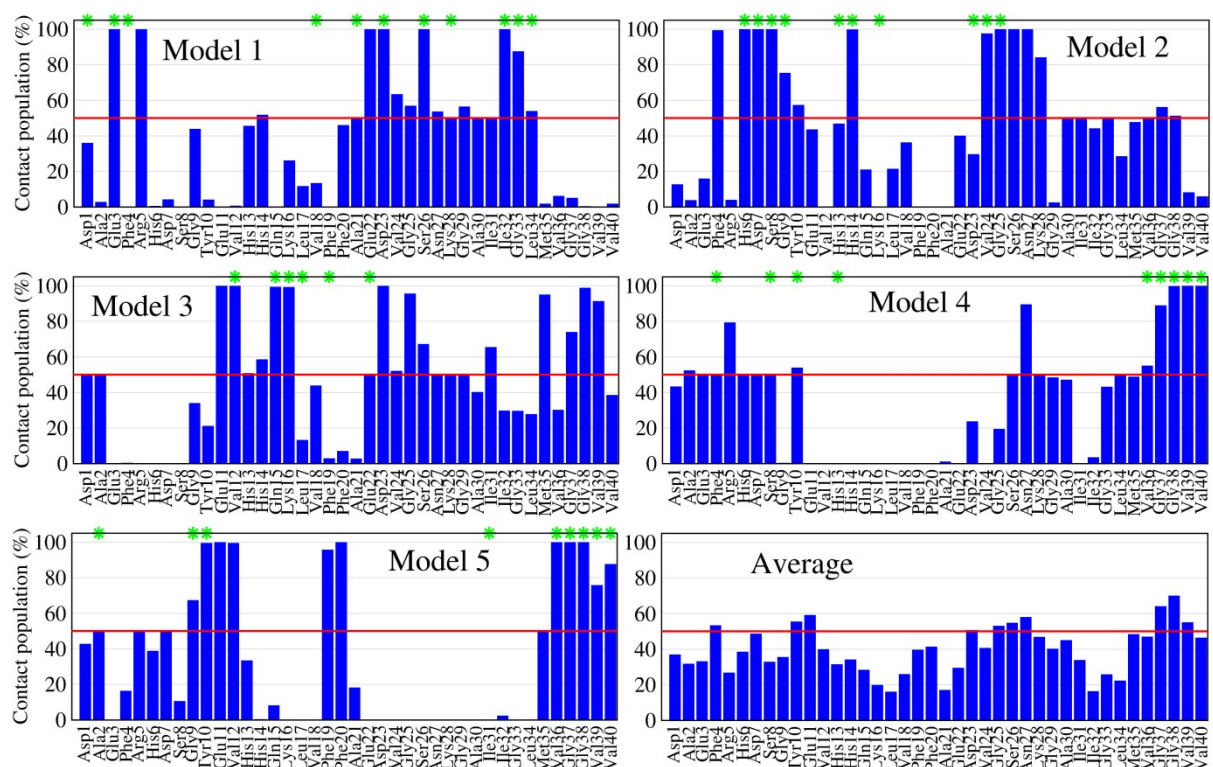

Figure S8. Probability that amino acid (AA) stays in contact with isomer L7 of fullerene C60(OH)16 in equilibrium. AAs with green stars have contact with ligand by docking method. Red line refers to probability of 50% above which the binding is strong.

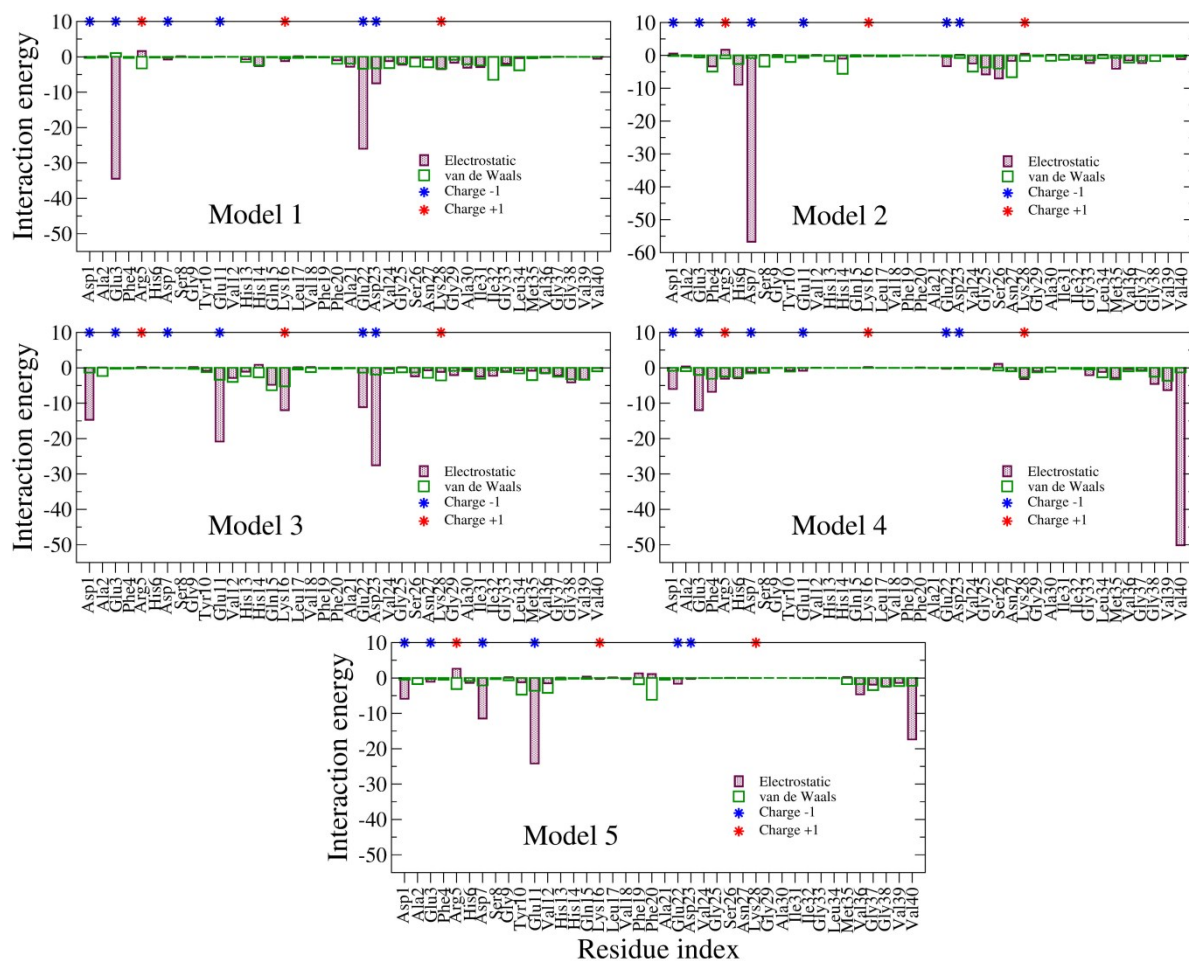

Figure S9. Per-residue distributions for vdW and Coulomb interactions with isomer L7 of fulleranol C60(OH)16. Results were obtained by MD simulations. The interaction energy is in kcal/mol.
